# Supplementary material for: Identifying meaningful change on PROMIS short forms in cancer patients: a comparison of item response theory and classic test theory frameworks
Source: Springer Nature journal article supplement (doi:10.1007/s11136-022-03255-3), 2022-09-24
Supplement: MOESM1 [file 23536812]

Appendix. Example of actual patient responses where IRT classified patients as not reliably changing but CTT as reliably changing.

#### A. Anxiety

| Baseline score of 37                                                        | Follow-up score of 47                                                        |
|-----------------------------------------------------------------------------|------------------------------------------------------------------------------|
| 1. I felt fearful. <b>Never</b>                                             | 1. I felt fearful. <b>Never</b>                                              |
| 2. I found it hard to focus on anything other than my anxiety. <b>Never</b> | 2. I found it hard to focus on anything other than my anxiety. <b>Rarely</b> |
| 3. My worries overwhelmed me. <b>Never</b>                                  | 3. My worries overwhelmed me. <b>Rarely</b>                                  |
| 4. I felt uneasy. <b>Never</b>                                              | 4. I felt uneasy. <b>Never</b>                                               |
| 5. I felt nervous. <b>Never</b>                                             | 5. I felt nervous. <b>Never</b>                                              |
| 6. I felt like I needed help for my anxiety. <b>Never</b>                   | 6. I felt like I needed help for my anxiety. <b>Never</b>                    |
| 7. I felt anxiety. <b>Never</b>                                             | 7. I felt anxiety. <b>Never</b>                                              |
| 8. I felt tense. <b>Never</b>                                               | 8. I felt tense. <b>Never</b>                                                |

#### B. Depression

| Baseline score of 38                                          | Follow-up score of 48                                          |
|---------------------------------------------------------------|----------------------------------------------------------------|
| 1. I felt worthless. <b>Never</b>                             | 1. I felt worthless. <b>Never</b>                              |
| 2. I felt helpless. <b>Never</b>                              | 2. I felt helpless. <b>Never</b>                               |
| 3. I felt depressed. <b>Never</b>                             | 3. I felt depressed. <b>Never</b>                              |
| 4. I felt hopeless. <b>Never</b>                              | 4. I felt hopeless. <b>Rarely</b>                              |
| 5. I felt like a failure. <b>Never</b>                        | 5. I felt like a failure. <b>Never</b>                         |
| 6. I felt unhappy. <b>Never</b>                               | 6. I felt unhappy. <b>Never</b>                                |
| 7. I felt that I had nothing to look forward to. <b>Never</b> | 7. I felt that I had nothing to look forward to. <b>Rarely</b> |
| 8. I felt that nothing could cheer me up. <b>Never</b>        | 8. I felt that nothing could cheer me up. <b>Never</b>         |

### C. Fatigue

| Baseline score of 29                                                                                                                                                                                                                                                                                                                                                                                                                                                                                                                                                                                                                                                                                                                                                                         | Follow-up score of 40                                                                                                                                                                                                                                                                                                                                                                                                                                                                                                                                                                                                                                                                                                                                                                           |
|----------------------------------------------------------------------------------------------------------------------------------------------------------------------------------------------------------------------------------------------------------------------------------------------------------------------------------------------------------------------------------------------------------------------------------------------------------------------------------------------------------------------------------------------------------------------------------------------------------------------------------------------------------------------------------------------------------------------------------------------------------------------------------------------|-------------------------------------------------------------------------------------------------------------------------------------------------------------------------------------------------------------------------------------------------------------------------------------------------------------------------------------------------------------------------------------------------------------------------------------------------------------------------------------------------------------------------------------------------------------------------------------------------------------------------------------------------------------------------------------------------------------------------------------------------------------------------------------------------|
| <ol style="list-style-type: none"> <li>1. How often did you feel tired? <b>Never</b></li> <li>2. How often did you experience Extreme exhaustion? <b>Never</b></li> <li>3. How often did you run out of energy? <b>Never</b></li> <li>4. How often did your fatigue limit You at work (include work at home)? <b>Never</b></li> <li>5. How often were you too tired to think clearly? <b>Never</b></li> <li>6. How often were you too tired to take a bath or shower? <b>Never</b></li> <li>7. How often did you have enough energy to get things done due to fatigue? <b>Always</b></li> <li>8. How often did you have to push yourself to get things done due to fatigue? <b>Never</b></li> <li>9. How often did you have trouble Finishing things due to fatigue? <b>Never</b></li> </ol> | <ol style="list-style-type: none"> <li>1. How often did you feel tired? <b>Sometimes</b></li> <li>2. How often did you experience Extreme exhaustion? <b>Never</b></li> <li>3. How often did you run out of energy? <b>Never</b></li> <li>4. How often did your fatigue limit You at work (include work at home)? <b>Never</b></li> <li>5. How often were you too tired to think clearly? <b>Never</b></li> <li>6. How often were you too tired to take a bath or shower? <b>Never</b></li> <li>7. How often did you have enough energy to get things done due to fatigue? <b>Never</b></li> <li>8. How often did you have to push yourself to get things done due to fatigue? <b>Never</b></li> <li>9. How often did you have trouble Finishing things due to fatigue? <b>Never</b></li> </ol> |

Note. The item, “How often did you have enough energy to get things done due to fatigue” had low correlations (Spearman’s correlation: 0.05 to 0.16) with the other items due to the scoring scale that runs in the opposite direction.

#### D. Sleep disturbance

| Baseline score of 31                                                                                                                                                                                                                                                                                                                                                                                                                                                                                                                | Follow-up score of 40                                                                                                                                                                                                                                                                                                                                                                                                                                                                                                                |
|-------------------------------------------------------------------------------------------------------------------------------------------------------------------------------------------------------------------------------------------------------------------------------------------------------------------------------------------------------------------------------------------------------------------------------------------------------------------------------------------------------------------------------------|--------------------------------------------------------------------------------------------------------------------------------------------------------------------------------------------------------------------------------------------------------------------------------------------------------------------------------------------------------------------------------------------------------------------------------------------------------------------------------------------------------------------------------------|
| <ol style="list-style-type: none"> <li>1. My sleep quality was <b>Very good</b></li> <li>2. My sleep was refreshing. <b>Very much</b></li> <li>3. I had a problem with my Sleep. <b>Not at all</b></li> <li>4. I had difficulty falling asleep. <b>Not at all</b></li> <li>5. My sleep was restless. <b>Not at all</b></li> <li>6. I tried hard to get to sleep <b>Not at all</b></li> <li>7. I worried about not being able to fall asleep <b>Not at all</b></li> <li>8. I was satisfied with my sleep <b>Very much</b></li> </ol> | <ol style="list-style-type: none"> <li>1. My sleep quality was <b>Good</b></li> <li>2. My sleep was refreshing. <b>Very much</b></li> <li>3. I had a problem with my Sleep. <b>A little bit</b></li> <li>4. I had difficulty falling asleep. <b>Not at all</b></li> <li>5. My sleep was restless. <b>A little bit</b></li> <li>6. I tried hard to get to sleep <b>Not at all</b></li> <li>7. I worried about not being able to fall asleep <b>Not at all</b></li> <li>8. I was satisfied with my sleep <b>Quite a bit</b></li> </ol> |

#### E. Pain interference

| Baseline score of 41                                                                                                                                                                                                                                                                                                                                                                                                                                                                                                                                                                                                                                                                                                                                                                                          | Follow-up score of 50                                                                                                                                                                                                                                                                                                                                                                                                                                                                                                                                                                                                                                                                                                                                                                                             |
|---------------------------------------------------------------------------------------------------------------------------------------------------------------------------------------------------------------------------------------------------------------------------------------------------------------------------------------------------------------------------------------------------------------------------------------------------------------------------------------------------------------------------------------------------------------------------------------------------------------------------------------------------------------------------------------------------------------------------------------------------------------------------------------------------------------|-------------------------------------------------------------------------------------------------------------------------------------------------------------------------------------------------------------------------------------------------------------------------------------------------------------------------------------------------------------------------------------------------------------------------------------------------------------------------------------------------------------------------------------------------------------------------------------------------------------------------------------------------------------------------------------------------------------------------------------------------------------------------------------------------------------------|
| <ol style="list-style-type: none"> <li>1. How much did pain interfere with Your day to day activities? <b>Not at all</b></li> <li>2. How much did pain interfere with Work around the home? <b>Not at all</b></li> <li>3. How much did pain interfere with your ability to participate in social activities? <b>Not at all</b></li> <li>4. How much did pain interfere with your household chores? <b>Not at all</b></li> <li>5. How much did pain interfere with the things you usually do for fun? <b>Not at all</b></li> <li>6. How much did pain interfere with your enjoyment of social activities? <b>Not at all</b></li> <li>7. How much did pain interfere with your enjoyment of life? <b>Not at all</b></li> <li>8. How much did pain interfere with your family life? <b>Not at all</b></li> </ol> | <ol style="list-style-type: none"> <li>1. How much did pain interfere with Your day to day activities? <b>A little bit</b></li> <li>2. How much did pain interfere with Work around the home? <b>A little bit</b></li> <li>3. How much did pain interfere with your ability to participate in social activities? <b>Not at all</b></li> <li>4. How much did pain interfere with your household chores? <b>Not at all</b></li> <li>5. How much did pain interfere with the things you usually do for fun? <b>Not at all</b></li> <li>6. How much did pain interfere with your enjoyment of social activities? <b>Not at all</b></li> <li>7. How much did pain interfere with your enjoyment of life? <b>Not at all</b></li> <li>8. How much did pain interfere with your family life? <b>Not at all</b></li> </ol> |

F. Pain interference

| Baseline score of 40.5                                                                                                                                                                                                                                                                                                                                                                                                                                                                                                                                                                                                                                                                                                                                                                               | Follow-up score of 50.3                                                                                                                                                                                                                                                                                                                                                                                                                                                                                                                                                                                                                                                                                                                                                                                  |
|------------------------------------------------------------------------------------------------------------------------------------------------------------------------------------------------------------------------------------------------------------------------------------------------------------------------------------------------------------------------------------------------------------------------------------------------------------------------------------------------------------------------------------------------------------------------------------------------------------------------------------------------------------------------------------------------------------------------------------------------------------------------------------------------------|----------------------------------------------------------------------------------------------------------------------------------------------------------------------------------------------------------------------------------------------------------------------------------------------------------------------------------------------------------------------------------------------------------------------------------------------------------------------------------------------------------------------------------------------------------------------------------------------------------------------------------------------------------------------------------------------------------------------------------------------------------------------------------------------------------|
| <ol style="list-style-type: none"><li>1. How much did pain interfere with Your day to day activities? <b>Not at all</b></li><li>2. How much did pain interfere with Work around the home? <b>Not at all</b></li><li>3. How much did pain interfere with your ability to participate in social activities? <b>Not at all</b></li><li>4. How much did pain interfere with your household chores? <b>Not at all</b></li><li>5. How much did pain interfere with the things you usually do for fun? <b>Not at all</b></li><li>6. How much did pain interfere with your enjoyment of social activities? <b>Not at all</b></li><li>7. How much did pain interfere with your enjoyment of life? <b>Not at all</b></li><li>8. How much did pain interfere with your family life? <b>Not at all</b></li></ol> | <ol style="list-style-type: none"><li>1. How much did pain interfere with Your day to day activities? <b>A little bit</b></li><li>2. How much did pain interfere with Work around the home? <b>A little bit</b></li><li>3. How much did pain interfere with your ability to participate in social activities? <b>Not at all</b></li><li>4. How much did pain interfere with your household chores? <b>Not at all</b></li><li>5. How much did pain interfere with the things you usually do for fun? <b>Not at all</b></li><li>6. How much did pain interfere with your enjoyment of social activities? <b>Not at all</b></li><li>7. How much did pain interfere with your enjoyment of life? <b>Not at all</b></li><li>8. How much did pain interfere with your family life? <b>Not at all</b></li></ol> |
